# Supplementary figures and images for: Using an Antibiogram Profile to Improve Infection Control and Rational Antimicrobial Therapy in an Urban Hospital in The Gambia, Strategies and Lessons for Low- and Middle-Income Countries
Source: MDPI journal article supplement (doi:10.3390/antibiotics12040790), 2023-04-21

Suppl figure S1a

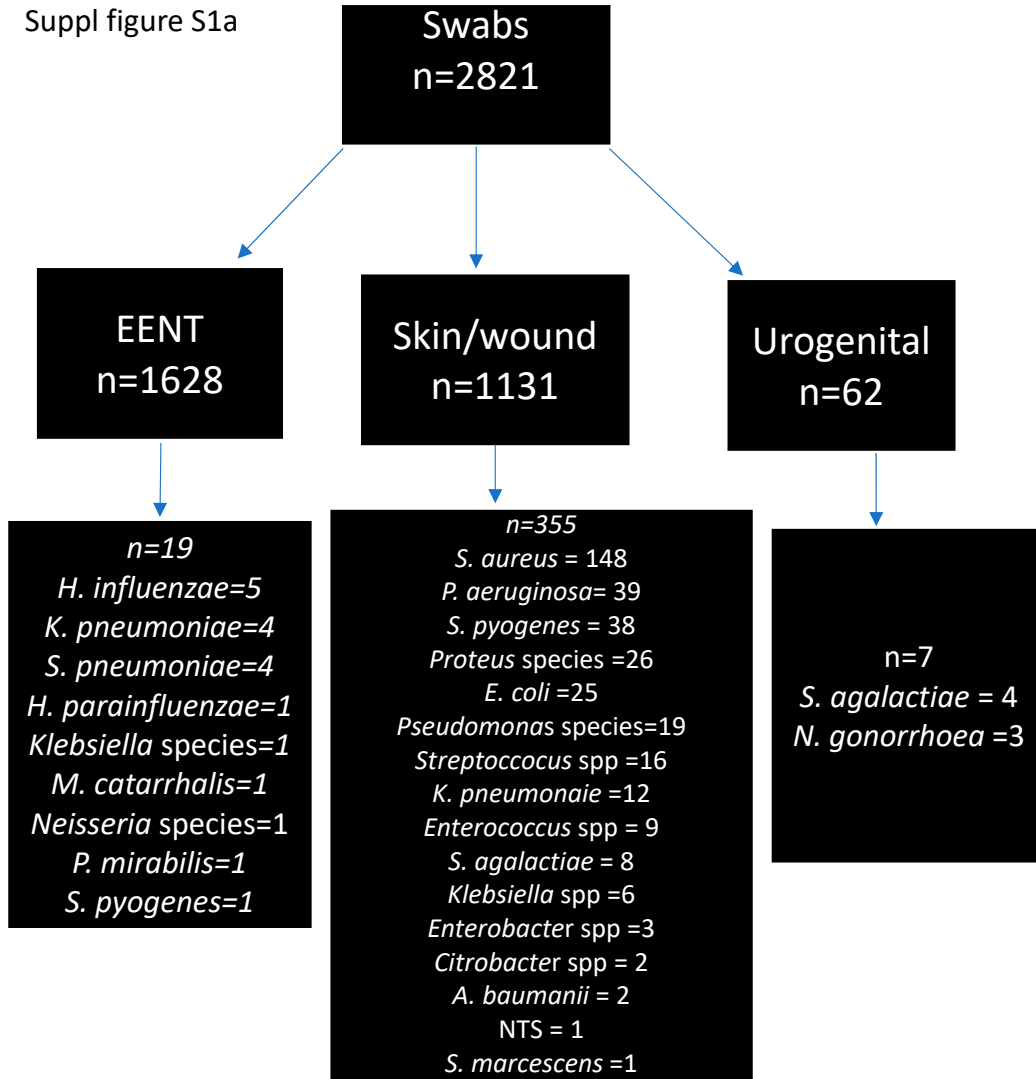

Suppl figure S1b

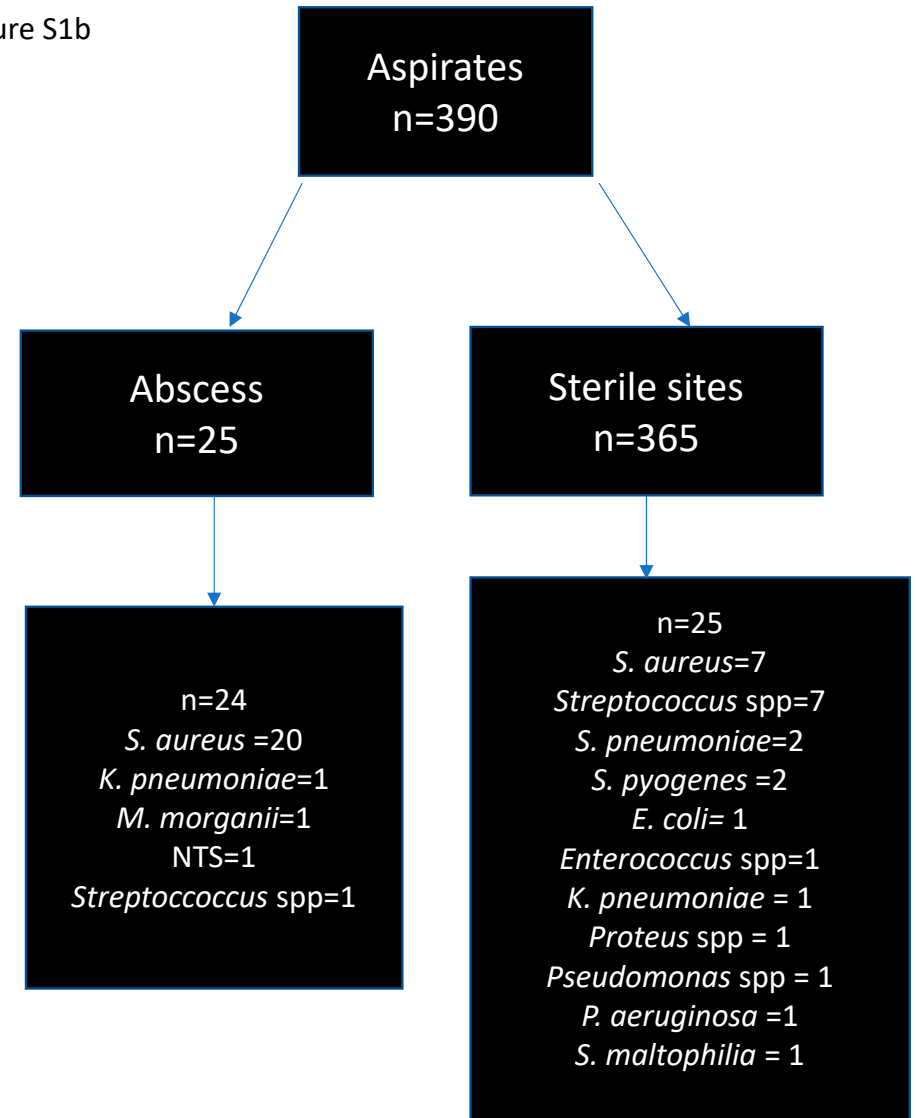

Supplement: s1 [file s1]

Supplementary figure S2

OVERALL DISTRIBUTION OF PATHOGENS AMONG DIFFERENT SAMPLES

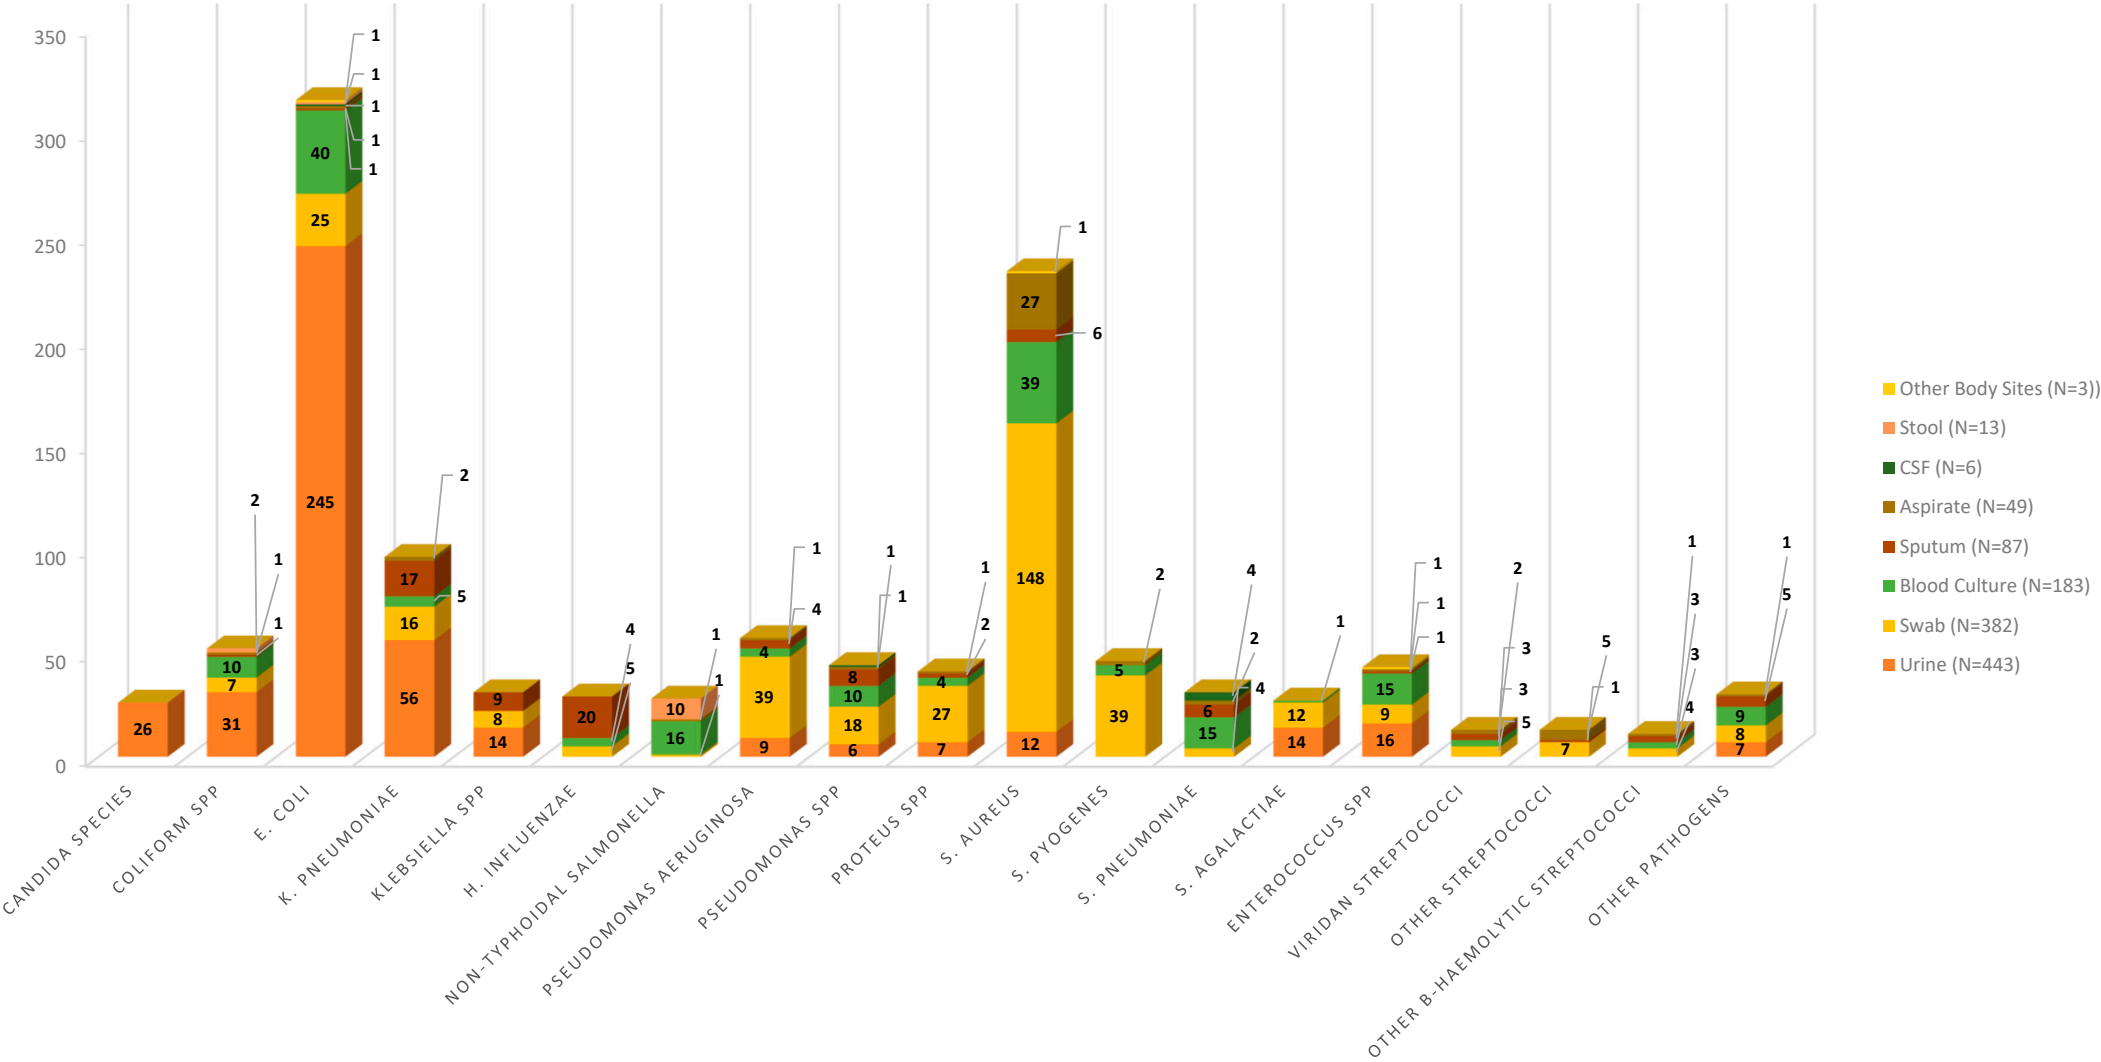

Supplement: s1 [file s1]
